# Supplementary material
Source: PubMed Central journal article supplement (PMC4446146)
Supplement: NIHMS673356-supplement-2.pdf [file NIHMS673356-supplement-2.pdf]

| Figure        | # neurons | # slices / # observations | # animals | # neurons for recovery |
|---------------|-----------|---------------------------|-----------|------------------------|
| 1c Bottom, 1d |           |                           | 5         |                        |
| 1f – g        | 85        |                           | 9         |                        |
| 2c : SOM      | 16        | 16                        | 7         |                        |
| 2c : VIP      | 8         | 7                         | 4         |                        |
| 2c : L1       | 7         | 7                         | 3         |                        |
| 2e : SOM      | 9         | 9                         | 3         |                        |
| 2e : VIP      | 10        | 10                        | 4         |                        |
| 2e : L1       | 8         | 7                         | 3         |                        |
| 2h            | 6         | 6                         | 3         | 5                      |
| 2k            | 6         | 6                         | 3         | 6                      |
| 2n            | 7         | 7                         | 4         | 7                      |
| 3b            | 5         | 5                         | 3         |                        |
| 3e            | 5         | 5                         | 3         | 5                      |
| 3h            | 8         | 8                         | 4         | 8                      |
| 4c            | 11        |                           | 6         |                        |
| 4f            | 23        |                           | 4         |                        |
| 4i            | 85        |                           | 9         |                        |
| 5b-c          | 8         |                           | 4         |                        |
| 5e            |           |                           | 8         |                        |
| 5g-h          | 49        |                           | 5         |                        |
| 6c            |           |                           | 5         |                        |
| 6e            |           |                           | 3         |                        |
| 7c            |           |                           | 3         |                        |

Supplementary Table 1

Details of experiments described in Figs. 1 - 7.

| Figure                                 | # neurons     | # slices / # observations | # animals   | Recovery (# neurons) | Figure                                                                                       | # neurons    | # slices / # observations | # animals        | Recovery (# neurons) |
|----------------------------------------|---------------|---------------------------|-------------|----------------------|----------------------------------------------------------------------------------------------|--------------|---------------------------|------------------|----------------------|
| Supp. 1d                               | 111 obs.      |                           | 22          |                      | Supp. 7a (Glu)<br>(Glu/Gaba)                                                                 | 15<br>8      | 14<br>8                   | 8<br>3           |                      |
| Supp. 1e                               | 5 obs. each   |                           | 1           |                      | Supp. 7b (Glu)<br>(Glu/Gaba)                                                                 | 7<br>7       | 7<br>7                    | 4<br>4           |                      |
| Supp. 1f, 1i: Nat Mov<br>Grating       | 57<br>28      |                           | 6<br>3      |                      | Supp. 7c                                                                                     | 6            | 5                         | 3                | 5                    |
| Supp. 1g                               | 85            |                           | 9           |                      | Supp. 7d                                                                                     | 9            | 9                         | 4                | 8                    |
| Supp. 1h                               | 584 pairs     |                           | 9           |                      | Supp. 8b-c                                                                                   | 5            | 5                         | 4                |                      |
| Supp. 2b – c : SOM<br>VIP<br>L1        | 14<br>11<br>9 |                           | 6<br>5<br>5 |                      | Supp. 8e-f                                                                                   | 5            | 5                         | 3                |                      |
| Supp. 3a: SOM (Glu)<br>(Glu/Gaba)      | 9<br>9        | 9<br>9                    | 3<br>4      |                      | Supp. 8h-i                                                                                   | 6            | 6                         | 3                | 5                    |
| Supp. 3b: VIP (Glu)<br>(Glu/Gaba)      | 10<br>10      | 10<br>10                  | 4<br>4      |                      | Supp. 9: PV<br>SOM                                                                           | 23<br>11     |                           | 4<br>6           |                      |
| Supp. 3c: L1 (Glu)<br>(Glu/Gaba)       | 8<br>9        | 7<br>9                    | 3<br>3      |                      | Supp. 10: ChAT-SOM Low Blue<br>ChAT-SOM High Blue<br>ChAT-VIP Low Blue<br>ChAT-VIP High Blue |              | 13<br>19<br>16<br>16      | 6<br>6<br>5<br>5 |                      |
| Supp. 3e                               | 8             | 8                         | 4           | 6                    | Supp. 11c                                                                                    |              |                           | 3                |                      |
| Supp. 3f                               | 7             | 7                         | 2           | 7                    | Supp. 11e-f                                                                                  | 36           |                           | 4                |                      |
| Supp. 4c                               | 3             | 3                         | 1           |                      | Supp. 12b                                                                                    | 322 pairs    |                           | 5                |                      |
| Supp. 5c                               | 17            | 17                        | 6           |                      | Supp. 12d                                                                                    |              |                           | 4                |                      |
| Supp. 5d                               | 5             | 4                         | 2           |                      | Supp. 13b                                                                                    | 9            | 8                         | 3                | 5                    |
| Supp. 5e                               | 9             | 9                         | 5           |                      | Supp. 13d                                                                                    | 7            | 7                         | 3                | 5                    |
| Supp. 5g                               | 10            | 7                         | 4           |                      | Supp. 13f                                                                                    | 5            | 4                         | 3                | 5                    |
| Supp. 5h                               | 6             | 5                         | 1           |                      | Supp. 13h                                                                                    | 8            | 7                         | 3                | 7                    |
| Supp. 5i                               | 8             | 8                         | 6           |                      | Supp. 13j : Arch<br>ACh<br>Arch + ACh                                                        | 10<br>8<br>7 | 10<br>8<br>7              | 3<br>3<br>3      |                      |
| Supp. 5k                               | 21            | 19                        | 16          |                      |                                                                                              |              |                           |                  |                      |
| Supp. 5l                               | 16            | 14                        | 8           |                      |                                                                                              |              |                           |                  |                      |
| Supp. 5m                               | 11            | 10                        | 4           |                      |                                                                                              |              |                           |                  |                      |
| Supp. 6b: Meca<br>Atropine             | 6<br>5        | 6<br>5                    | 3<br>2      | 3<br>3               |                                                                                              |              |                           |                  |                      |
| Supp. 6e : Meca<br>Atropine            | 6<br>5        | 6<br>5                    | 3<br>3      |                      |                                                                                              |              |                           |                  |                      |
| Supp. 6f: m1, m2<br>alpha-4<br>alpha-7 |               | 5<br>4<br>3               | 3<br>2<br>2 |                      |                                                                                              |              |                           |                  |                      |

Supplementary Table 2

Details of experiments described in Supplementary Figs. 1 - 13.

|  |
|--|
|  |
|--|
